# Supplementary material for: Gene expression in developing watermelon fruit
Source: PubMed Central journal article supplement (PMC2440768; doi:10.1186/1471-2164-9-275), 2008-06-05
Supplement: 1471-2164-9-275-S1.pdf [file 1471-2164-9-275-S1.pdf]

| <u>Accesion Number</u>                                           | <u>EST-unigene</u>                             | <u>E value</u> | <u>Plant species</u>             | <u>Biorep1<br/>green</u> | <u>Biorep1<br/>pink</u> | <u>Biorep1<br/>red</u> |
|------------------------------------------------------------------|------------------------------------------------|----------------|----------------------------------|--------------------------|-------------------------|------------------------|
| <b>Primary Metabolism</b>                                        |                                                |                |                                  |                          |                         |                        |
| AL01005A1F08                                                     | 2-oxo acid dehydrogenase, lipoyl-binding site  | 3.00E-50       | <i>Medicago truncatula</i>       | 1.98                     | 1.87                    | 2.50                   |
| AL01.68.C1.Contig65                                              | 3-oxo-5-alpha-steroid 4-dehydrogenase family   | 4.00E-84       | <i>Arabidopsis thaliana</i>      | 10.64                    | 14.83                   | 10.28                  |
| AL010002000D04                                                   | ADP-glucose pyrophosphorylase large subunit 1  | 8.00E-23       | <i>Citrullus lanatus</i>         | -3.25                    | -5.57                   | -2.84                  |
| AL01004X1H09                                                     | brassinosteroid-6-oxidase                      | 5.00E-31       | <i>Vitis vinifera</i>            | 4.64                     | 2.32                    | 1.98                   |
| AL01005A1G02                                                     | chloroplast ribosome recycling factor protein  | 1.00E-23       | <i>Spinacia oleracea</i>         | -3.30                    | -3.23                   | -3.19                  |
| AL01005B2B06                                                     | chloroplast small heat shock protein           | 1.00E-42       | <i>Capsicum frutescens</i>       | 8.82                     | 9.43                    | 10.04                  |
| AL010001000F09                                                   | copine-related                                 | 4.00E-43       | <i>Arabidopsis thaliana</i>      | 3.13                     | 3.03                    | 3.55                   |
| AL010002000E09                                                   | cytochrome b5 family protein #4                | 2.00E-15       | <i>Arabidopsis thaliana</i>      | -2.10                    | -1.41                   | -1.75                  |
| AL010002000B04                                                   | cytochrome b5 reductase isoform II             | 4.00E-50       | <i>Zea mays</i>                  | -2.32                    | -1.53                   | -2.10                  |
| AL01006A1A09                                                     | cytochrome b561                                | 4.00E-22       | <i>Citrullus lanatus</i>         | -4.00                    | -3.87                   | -2.48                  |
| AL010002000A05                                                   | cytochrome c oxidase                           | 5.00E-23       | <i>Pinguicula sp.</i>            | 2.67                     | 2.53                    | 3.02                   |
| AL01005B1E08                                                     | cytochrome P450 protein                        | 2.00E-26       | <i>Arabidopsis thaliana</i>      | 12.51                    | 16.29                   | 5.39                   |
| AL01.73.C1.Contig70                                              | cytochrome P450-like protein                   | 2.00E-76       | <i>Arabidopsis thaliana</i>      | 6.92                     | 7.89                    | 4.67                   |
| AL010001000G11                                                   | dihydrolipoamide succinyltransferase           | 8.00E-35       | <i>Arabidopsis thaliana</i>      | 1.20                     | 1.71                    | 2.25                   |
| AL01005B1B12                                                     | disulfide bond formation protein               | 6.00E-37       | <i>Arabidopsis thaliana</i>      | 1.42                     | 4.34                    | 4.09                   |
| AL01.10.C1.Contig10                                              | enoyl-CoA hydratase                            | 3.00E-92       | <i>Arabidopsis thaliana</i>      | -2.49                    | -2.19                   | -2.01                  |
| AL010002000C03                                                   | ent-kaurenoic acid oxidase                     | 7.00E-70       | <i>Pisum sativum</i>             | 2.87                     | 2.51                    | 2.04                   |
| AL01005B2C07                                                     | ent-kaurene synthase                           | 7.00E-89       | <i>Cucumis sativus</i>           | -2.03                    | -1.38                   | -1.50                  |
| AL01.57.C1.Contig54                                              | epicotyl-specific tissue protein               | 7.00E-15       | <i>Striga asiatica</i>           | 7.88                     | 1.36                    | -1.20                  |
| AL010001000C11                                                   | ferredoxin III                                 | 4.00E-40       | <i>Musa acuminata</i>            | 3.14                     | 2.90                    | 3.83                   |
| AL01.41.C1.Contig39                                              | formate dehydrogenase, mitochondrial precursor | 4.00E-76       | <i>Quercus robur</i>             | 2.04                     | 2.74                    | 2.25                   |
| AL01005B2F12                                                     | Glutamine synthetase cytosolic isozyme 1       | 9.00E-67       | <i>Vitis vinifera</i>            | 5.06                     | 3.07                    | 2.69                   |
| AL01004X1G06                                                     | hydrolase family protein                       | 4.00E-31       | <i>Arabidopsis thaliana</i>      | -3.16                    | -2.68                   | -2.92                  |
| AL01.88.C1.Contig84                                              | lactoylglutathione lyase family protein        | 4.00E-72       | <i>Arabidopsis thaliana</i>      | 9.05                     | 8.80                    | 4.22                   |
| AL01.61.C1.Contig58                                              | lipase class 3 family protein                  | 3.00E-43       | <i>Arabidopsis thaliana</i>      | 12.26                    | 7.95                    | 4.84                   |
| AL01006A2G06                                                     | malate dehydrogenase                           | 8.00E-103      | <i>Vitis vinifera</i>            | 2.42                     | 1.98                    | -1.24                  |
| AL010001000H04                                                   | malate dehydrogenase, glyoxysomal precursor    | 5.00E-72       | <i>Citrullus lanatus</i>         | -6.58                    | -5.86                   | -3.49                  |
| AL01006B2E04                                                     | peroxidase ATP2a                               | 9.00E-19       | <i>Arabidopsis thaliana</i>      | 3.84                     | 2.86                    | -2.65                  |
| AL01005B2F03                                                     | phosphoenolpyruvate carboxylase                | 2.00E-17       | <i>Cucumis sativus</i>           | -2.01                    | -1.80                   | -2.16                  |
| AL01005B2H10                                                     | plastid ribosomal protein L11                  | 7.00E-72       | <i>Arabidopsis thaliana</i>      | -5.17                    | -5.25                   | -4.27                  |
| AL01.9.C1.Contig9                                                | pyruvate decarboxylase                         | 3.00E-132      | <i>Solanum tuberosum</i>         | 20.45                    | 25.44                   | 23.66                  |
| AL01004X1F12                                                     | red chlorophyll catabolite reductase           | 1.00E-76       | <i>Solanum lycopersicum</i>      | 1.03                     | -2.35                   | -2.33                  |
| AL01005B2B03                                                     | short-chain dehydrogenase/reductase 2          | 3.00E-58       | <i>Lactuca sativa</i>            | 12.32                    | 4.72                    | 8.67                   |
| AL01003X1F01                                                     | serine racemase                                | 8.00E-13       | <i>Arabidopsis thaliana</i>      | -1.73                    | -2.23                   | -1.72                  |
| AL01.63.C1.Contig60                                              | specific tissue protein 2                      | 2.00E-25       | <i>Cicer arietinum</i>           | 25.74                    | 5.68                    | 3.15                   |
| AL01005A2H02                                                     | UDP-glucose 6-dehydrogenase                    | 2.00E-126      | <i>Glycine max</i>               | 1.32                     | 1.26                    | 2.04                   |
| AL01006A2B05                                                     | urate oxidase                                  | 3.00E-53       | <i>Vitis vinifera</i>            | 2.61                     | 2.77                    | 1.51                   |
| <b>Amino Acid Synthesis, Processing, and Protein Degradation</b> |                                                |                |                                  |                          |                         |                        |
| AL01004X1A03                                                     | 60S ribosomal protein L37a                     | 2.00E-46       | <i>Capsicum chinense</i>         | 2.04                     | 1.43                    | 1.79                   |
| AL01004X1F08                                                     | alanine:glyoxylate aminotransferase 2          | 1.00E-42       | <i>Arabidopsis thaliana</i>      | 3.83                     | 1.76                    | -1.23                  |
| AL01003X1A10                                                     | asparagine synthase-related protein            | 5.00E-36       | <i>Elaeis guineensis</i>         | 1.23                     | -1.26                   | -3.26                  |
| AL010002000H04                                                   | cyclophilin                                    | 4.00E-57       | <i>Citrus cv. Shiranuhi</i>      | -1.48                    | -2.38                   | -1.97                  |
| AL01005B2E08                                                     | cysteine protease 1                            | 3.00E-68       | <i>Actinidia deliciosa</i>       | 2.92                     | 1.60                    | 1.33                   |
| AL01.7.C1.Contig7                                                | hECT ubiquitin-protein ligase 3                | 3.00E-09       | <i>Brassica rapa</i>             | 1.05                     | -1.89                   | -3.92                  |
| AL01005A2G12                                                     | OTU-like cysteine protease family protein      | 2.00E-49       | <i>Arabidopsis thaliana</i>      | -2.35                    | -1.71                   | -1.51                  |
| AL01.49.C1.Contig46                                              | papain-like cysteine peptidase XBCP3           | 4.00E-26       | <i>Arabidopsis thaliana</i>      | 2.57                     | 3.74                    | 3.03                   |
| AL01005A2F07                                                     | prolylcarboxypeptidase-like protein            | 3.00E-75       | <i>Arabidopsis thaliana</i>      | -1.39                    | -2.18                   | -2.22                  |
| AL01005A1B07                                                     | putative subtilisin-like protein               | 7.00E-69       | <i>Oryza sativa</i>              | -2.13                    | -1.55                   | -1.96                  |
| AL010002000E11                                                   | S-adenosylmethionine decarboxylase             | 4.00E-66       | <i>Citrofortunella mitis</i>     | -4.02                    | -1.39                   | -1.46                  |
| AL01003X1E05                                                     | serine-type peptidase                          | 2.00E-70       | <i>Arabidopsis thaliana</i>      | 2.10                     | 2.59                    | 3.25                   |
| AL01005A1H10                                                     | subtilisin                                     | 1.00E-05       | <i>Narcissus pseudonarcissus</i> | 9.54                     | 3.03                    | -1.14                  |
| AL01.74.C1.Contig71                                              | subtilisin-type protease precursor             | 3.00E-105      | <i>Glycine max</i>               | 21.75                    | 20.23                   | 7.99                   |
| AL01006A1G08                                                     | ubiquitin (UBA)/TS-N domain-containing protein | 4.00E-11       | <i>Arabidopsis thaliana</i>      | 2.77                     | 3.77                    | 4.34                   |
| AL010002000D06                                                   | ubiquitin-conjugating enzyme 8                 | 6.00E-82       | <i>Capsicum annum</i>            | 2.32                     | 2.35                    | 1.99                   |
| AL01005A1D01                                                     | ubiquitin-protein ligase                       | 5.00E-79       | <i>Arabidopsis thaliana</i>      | 2.88                     | 3.67                    | 3.39                   |
| AL01006B2B08                                                     | ubiquitin-protein ligase 7                     | 3.00E-57       | <i>Arabidopsis thaliana</i>      | 1.04                     | 2.23                    | 1.71                   |
| <b>Membrane and Transport</b>                                    |                                                |                |                                  |                          |                         |                        |
| AL01.50.C1.Contig47                                              | globulin-like protein                          | 9.00E-27       | <i>Arabidopsis thaliana</i>      | 25.70                    | 41.54                   | 12.26                  |
| AL01.55.C1.Contig52                                              | integral membrane family protein               | 5.00E-15       | <i>Arabidopsis thaliana</i>      | 3.27                     | 2.93                    | 3.03                   |
| AL01.83.C1.Contig79                                              | annexin                                        | 2.00E-16       | <i>Fragaria x ananassa</i>       | 2.11                     | 3.93                    | 3.97                   |
| AL01.85.C1.Contig81                                              | gamma-soluble NSF attachment protein           | 1.00E-48       | <i>Arabidopsis thaliana</i>      | 1.47                     | 2.29                    | 2.51                   |

|                |                                                  |          |                               |       |       |       |
|----------------|--------------------------------------------------|----------|-------------------------------|-------|-------|-------|
| AL010001000G01 | DUF895 domain protein                            | 1.00E-16 | <i>Aspergillus clavatus</i>   | 1.28  | -2.43 | -2.14 |
| AL010002000A08 | aquaporin                                        | 2.00E-82 | <i>Cucurbita ficifolia</i>    | -3.41 | -2.63 | -3.88 |
| AL010002000F03 | type IIB calcium ATPase                          | 4.00E-30 | <i>Medicago truncatula</i>    | -3.93 | -2.24 | -2.99 |
| AL01003X1B03   | tonoplast monosaccharide transporter             | 5.00E-65 | <i>Arabidopsis thaliana</i>   | 3.02  | 2.80  | 2.09  |
| AL01003X1C05   | copine-related                                   | 2.00E-16 | <i>Arabidopsis thaliana</i>   | 2.97  | 2.65  | 3.50  |
| AL01005A1D04   | membrane protein                                 | 7.00E-58 | <i>Oryza sativa</i>           | 1.12  | 4.20  | 4.65  |
| AL01005A2F02   | Embryo-specific 3;lipoygenase                    | 4.00E-48 | <i>Medicago truncatula</i>    | 2.84  | 7.84  | 6.88  |
| AL01005B1B05   | Pm52                                             | 3.00E-14 | <i>Prunus mume</i>            | -1.13 | -1.73 | -2.17 |
| AL01005B1D10   | sulphate transporter                             | 1.00E-13 | <i>Brassica napus</i>         | -4.40 | -3.37 | -5.01 |
| AL01005B1G06   | endomembrane protein 70                          | 1.00E-12 | <i>Arabidopsis thaliana</i>   | -1.64 | -2.53 | -2.55 |
| AL01005B2A04   | sugar transporter-like protein                   | 5.00E-26 | <i>Nicotiana langsdorffii</i> | -6.88 | -6.62 | -5.85 |
| AL01005B2C12   | plasma membrane H <sup>+</sup> -ATPase           | 5.00E-09 | <i>Daucus carota</i>          | 7.68  | 10.81 | 12.85 |
| AL01006A1B03   | putative indole-3-glycerol phosphate synthase    | 4.00E-22 | <i>Arabidopsis thaliana</i>   | -2.73 | -2.26 | -2.45 |
| AL01006A1B09   | sugar transporter                                | 4.00E-37 | <i>Oryza sativa</i>           | 6.39  | 6.96  | 1.44  |
| AL01006A1C01   | MRP-like ABC transporter                         | 1.00E-46 | <i>Oryza sativa</i>           | -6.80 | -2.79 | -4.07 |
| AL01006A1C11   | sulphate transporter                             | 6.00E-52 | <i>Populus alba</i>           | -3.43 | -3.60 | -1.80 |
| AL01006A1H12   | peptide transport protein                        | 4.00E-25 | <i>Arabidopsis thaliana</i>   | -2.06 | 2.31  | 1.13  |
| AL01006A2A10   | heavy-metal-associated domain-containing protein | 3.00E-27 | <i>Arabidopsis thaliana</i>   | 2.76  | 3.74  | 4.13  |
| AL01006A2E01   | patellin 1                                       | 2.00E-54 | <i>Cucurbita pepo</i>         | -3.68 | -3.86 | -3.74 |
| AL01006B1D01   | farnesylated protein 3; metal ion binding        | 3.00E-61 | <i>Arabidopsis thaliana</i>   | -2.02 | -2.28 | -2.30 |
| AL01006B1D09   | coated vesicle membrane protein                  | 5.00E-89 | <i>Triticum aestivum</i>      | 2.38  | 2.48  | 2.46  |
| AL01006B2F09   | chloroplast ATP/ADP translocator                 | 2.00E-94 | <i>Pisum sativum</i>          | 2.17  | 1.97  | 2.21  |
| AL01006B2G11   | translocase inner membrane subunit 44-2          | 7.00E-22 | <i>Arabidopsis thaliana</i>   | -2.01 | -1.42 | -1.55 |

#### Cell Division

|                |                                              |           |                       |       |       |       |
|----------------|----------------------------------------------|-----------|-----------------------|-------|-------|-------|
| AL010001000G09 | FtsZ protein                                 | 2.00E-102 | <i>Gentiana lutea</i> | -2.54 | -2.69 | -2.24 |
| AL01004X1A02   | phagocytosis and cell motility protein ELMO1 | 8.00E-59  | <i>Oryza sativa</i>   | 9.33  | 4.06  | 1.81  |

#### Cytoskeleton

|              |                                         |          |                             |       |       |       |
|--------------|-----------------------------------------|----------|-----------------------------|-------|-------|-------|
| AL01005A2B04 | alpha-tubulin 7                         | 3.00E-18 | <i>Populus tremuloides</i>  | 2.78  | 2.03  | 1.18  |
| AL01006B2D03 | Caltractin (Centrin)                    | 3.00E-24 | <i>Atriplex nummularia</i>  | 1.62  | 1.66  | 2.35  |
| AL01003X1A01 | caltractin / centrin                    | 3.00E-72 | <i>Arabidopsis thaliana</i> | 1.43  | 1.59  | 2.02  |
| AL01003X1D03 | prolyl 4-hydroxylase alpha subunit-like | 2.00E-07 | <i>Musa acuminata</i>       | -1.24 | -1.46 | -2.62 |

#### Cell Wall and Metabolism

|                     |                                                 |          |                             |        |        |        |
|---------------------|-------------------------------------------------|----------|-----------------------------|--------|--------|--------|
| AL01.48.C1.Contig45 | caffeoyl-CoA O-methyltransferase                | 4.00E-69 | <i>Populus sieboldii</i>    | 4.63   | 10.50  | 8.90   |
| AL01006B1C05        | copper-containing amine oxidase                 | 5.00E-66 | <i>Solanum lycopersicum</i> | 9.51   | 6.88   | 1.64   |
| AL01006B1D10        | expansin-like protein                           | 1.00E-34 | <i>Solanum tuberosum</i>    | 1.23   | 1.07   | 5.75   |
| AL01004X1D12        | fiber protein Fb19                              | 2.00E-50 | <i>Gossypium barbadense</i> | 10.11  | 9.95   | 12.39  |
| AL01006B1E08        | galactosyltransferase                           | 2.00E-05 | <i>Arabidopsis thaliana</i> | 3.17   | 4.48   | 4.04   |
| AL01006A2E04        | hydroxyproline-rich glycoprotein family protein | 2.00E-23 | <i>Arabidopsis thaliana</i> | 2.16   | 2.04   | 2.63   |
| AL01005B1B11        | invertase/pectin methylesterase inhibitor       | 3.00E-33 | <i>Arabidopsis thaliana</i> | -11.64 | -12.63 | -13.30 |
| AL01006A1H06        | LIM domain protein PLIM1                        | 2.00E-65 | <i>Solanum lycopersicum</i> | 2.91   | 5.98   | 4.73   |
| AL01004X1B06        | microtubule-associated protein                  | 6.00E-48 | <i>Arabidopsis thaliana</i> | 1.85   | 1.96   | 2.21   |
| AL01005A2C07        | nitrate-induced NOI protein                     | 3.00E-22 | <i>Arabidopsis thaliana</i> | 1.77   | 2.13   | 2.32   |
| AL01.34.C1.Contig33 | omega-6 fatty acid desaturase                   | 5.00E-53 | <i>Cucurbita pepo</i>       | -1.28  | -1.69  | -4.33  |
| AL01005B2A05        | pEARL1 1 / extensin-like protein                | 1.00E-23 | <i>Arabidopsis thaliana</i> | 13.86  | 12.79  | 11.46  |
| AL01.84.C1.Contig80 | pectin methylesterase                           | 2.00E-94 | <i>Nicotiana tabacum</i>    | -1.48  | -6.22  | -4.61  |
| AL01.58.C1.Contig55 | phloem filament protein PP1                     | 9.00E-21 | <i>Cucurbita maxima</i>     | 4.68   | -3.55  | -3.65  |
| AL01006B2D06        | plastid Tic40                                   | 2.00E-22 | <i>Ricinus communis</i>     | -2.33  | -2.23  | -2.17  |
| AL01003X1D01        | proline-rich protein                            | 1.00E-11 | <i>Glycine max</i>          | -5.10  | -14.45 | -20.16 |
| AL01005A2E10        | ripening-related protein                        | 5.00E-38 | <i>Arabidopsis thaliana</i> | -2.49  | -3.17  | -1.12  |

#### DNA, RNA Related and Gene Expression

|                     |                                                              |           |                             |       |       |       |
|---------------------|--------------------------------------------------------------|-----------|-----------------------------|-------|-------|-------|
| AL010002000C11      | 29 kDa ribonucleoprotein A, chloroplast precursor            | 5.00E-68  | <i>Nicotiana sylvestris</i> | -2.49 | -2.60 | -1.46 |
| AL01005A1A10        | Auxin-responsive protein IAA22                               | 1.00E-05  | <i>Oryza sativa</i>         | 6.53  | 4.16  | 2.60  |
| AL01005B2C10        | bZIP transcription factor                                    | 2.00E-19  | <i>Nicotiana tabacum</i>    | 1.94  | 2.06  | 1.42  |
| AL01005A2E09        | Ca(2+)-dependent DNase                                       | 3.00E-102 | <i>Populus tomentosa</i>    | 1.94  | 3.26  | 3.35  |
| AL01005A1E10        | CCAAT-box binding factor HAP5 homolog                        | 6.00E-34  | <i>Daucus carota</i>        | 2.05  | 2.18  | 2.09  |
| AL010001000C02      | EREBP-4 like protein                                         | 7.00E-50  | <i>Arabidopsis thaliana</i> | -1.61 | -2.74 | -2.77 |
| AL01006B2H09        | ERF-like protein                                             | 2.00E-63  | <i>Cucumis melo</i>         | 3.46  | 2.35  | 3.01  |
| AL01005A1B06        | ethylene insensitive (EIN3/EIL)-like transcription regulator | 8.00E-29  | <i>Fagus sylvatica</i>      | -2.90 | -2.84 | -3.20 |
| AL01.21.C1.Contig21 | jasmonic acid 2; NAM protein                                 | 1.00E-32  | <i>Solanum lycopersicum</i> | -2.23 | -1.86 | -1.52 |
| AL01005A2B07        | mads-box transcription factor                                | 9.00E-14  | <i>Momordica charantia</i>  | 12.13 | 19.40 | 21.82 |
| AL01005A2H08        | Mini zinc finger 2                                           | 5.00E-06  | <i>Arabidopsis thaliana</i> | 14.84 | 11.29 | 14.17 |
| AL01006B1A07        | MYB transcription factor MYB81                               | 5.00E-27  | <i>Glycine max</i>          | 2.38  | 3.06  | 1.37  |

|                     |                                           |          |                             |        |        |        |
|---------------------|-------------------------------------------|----------|-----------------------------|--------|--------|--------|
| AL01.82.C1.Contig78 | NAM (no apical meristem)-like protein     | 1.00E-26 | <i>Prunus persica</i>       | 14.46  | 20.03  | 22.43  |
| AL01.70.C1.Contig67 | NAM, no apical meristem,-like protein     | 1.00E-11 | <i>Arabidopsis thaliana</i> | 1.10   | 1.44   | 3.06   |
| AL01004X1E11        | nam-like protein 14                       | 1.00E-36 | <i>Petunia x hybrida</i>    | 4.46   | 3.43   | 3.28   |
| AL01006A1D01        | PHD finger transcription factor           | 5.00E-14 | <i>Arabidopsis thaliana</i> | -1.44  | -2.28  | -3.84  |
| AL01006A2A08        | pre-mRNA processing protein PRP39         | 5.00E-17 | <i>Oryza sativa</i>         | -2.16  | -2.52  | -2.97  |
| AL01006B1C11        | Ran-binding protein, putative             | 2.00E-61 | <i>Arabidopsis thaliana</i> | -2.06  | -1.19  | 1.24   |
| AL01005B1F04        | REX1 DNA Repair family protein            | 1.00E-26 | <i>Oryza sativa</i>         | 2.22   | 2.30   | 2.21   |
| AL01.29.C1.Contig28 | S-RNase                                   | 1.00E-23 | <i>Prunus dulcis</i>        | 5.40   | 11.73  | 9.09   |
| AL010001000D08      | tetratricopeptide-repeat thioredoxin-like | 2.00E-06 | <i>Arabidopsis thaliana</i> | -2.67  | -2.84  | -2.52  |
| AL010001000A04      | THUMP domain-containing protein           | 6.00E-71 | <i>Arabidopsis thaliana</i> | 1.80   | 2.27   | 1.85   |
| AL01006A1E06        | transcription factor bZIP38               | 4.00E-66 | <i>Glycine max</i>          | 2.03   | 2.76   | 2.46   |
| AL01004X1D07        | YGL010w-like protein                      | 6.00E-40 | <i>Picea mariana</i>        | 2.44   | 1.41   | 1.45   |
| AL01005B1E06        | zinc finger protein                       | 2.00E-21 | <i>Arabidopsis thaliana</i> | -10.01 | -11.93 | -12.76 |
| AL01005B1H11        | Zinc finger, CCCH-type                    | 4.00E-35 | <i>Medicago truncatula</i>  | 2.21   | 1.55   | 1.44   |

### Signal Transduction

|                     |                                                         |           |                                |       |       |       |
|---------------------|---------------------------------------------------------|-----------|--------------------------------|-------|-------|-------|
| AL010001000C07      | abscisic acid induced protein                           | 1.00E-39  | <i>Arabidopsis thaliana</i>    | 2.14  | 1.93  | 1.46  |
| AL01.37.C1.Contig36 | abscisic acid response protein                          | 1.00E-11  | <i>Cucumis melo</i>            | 13.28 | 11.75 | 11.13 |
| AL01004X1H01        | ACT domain-containing protein                           | 1.00E-63  | <i>Arabidopsis thaliana</i>    | -1.43 | -1.89 | -2.16 |
| AL01003X1F11        | Arabidopsis Rab GTPase homolog C1); GTP binding         | 2.00E-12  | <i>Arabidopsis thaliana</i>    | -1.66 | -2.09 | -2.18 |
| AL010001000D09      | auxin-repressed protein-like protein ARP1               | 2.00E-35  | <i>Manihot esculenta</i>       | 2.98  | 1.19  | -1.89 |
| AL01.59.C1.Contig56 | Avr9/Cf-9 rapidly elicited protein 146                  | 9.00E-13  | <i>Nicotiana tabacum</i>       | 4.19  | 3.85  | 4.38  |
| AL01.30.C1.Contig29 | BURP domain containing protein                          | 2.00E-53  | <i>Arabidopsis thaliana</i>    | 30.78 | 13.26 | 1.56  |
| AL01006B2D05        | calcium binding atopy-related autoantigen 1             | 5.00E-10  | <i>Oryza sativa</i>            | 1.16  | -2.20 | -2.32 |
| AL01005A1C09        | calcium-binding EF-hand family protein                  | 3.00E-36  | <i>Oryza sativa</i>            | -6.51 | -8.54 | -6.97 |
| AL010002000D03      | calmodulin                                              | 2.00E-24  | <i>Aegicerias corniculatum</i> | -2.16 | -3.19 | -2.00 |
| AL01006A1F11        | calmodulin-binding protein                              | 1.00E-75  | <i>Arabidopsis thaliana</i>    | 1.91  | 2.10  | 2.36  |
| AL01006A2G09        | CBL-interacting protein kinase 1                        | 1.00E-05  | <i>Populus trichocarpa</i>     | 6.47  | 29.80 | 6.42  |
| AL01.28.C1.Contig27 | CBL-interacting protein kinase 1                        | 3.00E-66  | <i>Populus trichocarpa</i>     | 4.56  | 19.61 | 4.18  |
| AL010001000B12      | cis-zeatin O-glucosyltransferase                        | 3.00E-08  | <i>Sorghum bicolor</i>         | 12.73 | 7.16  | 2.84  |
| AL01.17.C1.Contig17 | copper chaperone                                        | 1.00E-24  | <i>Populus alba</i>            | 4.31  | 2.99  | 2.22  |
| AL01005B1A12        | copper chaperone                                        | 3.00E-41  | <i>Oryza sativa</i>            | -1.58 | 1.32  | 2.45  |
| AL010002000A06      | copper-binding family protein                           | 4.00E-21  | <i>Arabidopsis thaliana</i>    | -2.16 | -2.69 | -4.03 |
| AL010001000G04      | cyclin dependent kinase A                               | 8.00E-96  | <i>Camellia sinensis</i>       | -1.37 | -1.77 | -2.04 |
| AL01006A2A03        | defense; calmodulin binding                             | 2.00E-68  | <i>Arabidopsis thaliana</i>    | -1.61 | -1.96 | -3.01 |
| AL01006A1H04        | elicitor-inducible protein EIG-J7                       | 1.00E-55  | <i>Capsicum annuum</i>         | -1.31 | -3.01 | -2.46 |
| AL01006B1H12        | enzyme-forming ethylene (ACC oxidase)                   | 1.00E-54  | <i>Cucumis melo</i>            | 6.36  | 3.32  | 9.21  |
| AL01006A2H11        | ethylene receptor; Cm-ETR1                              | 4.00E-95  | <i>Cucumis melo</i>            | 2.11  | 1.78  | 1.54  |
| AL01.20.C1.Contig20 | eukaryotic translation initiation factor 5A             | 4.00E-87  | <i>Rosa chinensis</i>          | -2.02 | -1.99 | -2.12 |
| AL01006B1B06        | IMPAIRED IN BABA-INDUCED STERILITY 1;kinase             | 1.00E-29  | <i>Arabidopsis thaliana</i>    | -1.96 | -2.11 | -1.93 |
| AL01006B1E12        | leucine-rich receptor-like protein kinase               | 4.00E-59  | <i>Arabidopsis thaliana</i>    | 1.70  | -1.28 | -3.01 |
| AL01005A1H02        | leucine-rich repeat transmembrane protein kinase        | 2.00E-34  | <i>Arabidopsis thaliana</i>    | -3.71 | -4.43 | -5.07 |
| AL01.25.C1.Contig25 | MFT-like protein                                        | 4.00E-16  | <i>Vitis vinifera</i>          | 1.94  | 2.99  | 1.69  |
| AL01006A2F12        | MILDEW RESISTANCE LOCUS O 1;calmodulin binding          | 2.00E-126 | <i>Arabidopsis thaliana</i>    | 1.67  | 3.16  | 2.44  |
| AL01005A2A06        | OXIDATIVE SIGNAL-INDUCIBLE1; kinase                     | 7.00E-56  | <i>Arabidopsis thaliana</i>    | -2.19 | -1.18 | 1.23  |
| AL01006B1H11        | PERK1-like protein kinase                               | 3.00E-81  | <i>Nicotiana tabacum</i>       | -3.68 | -3.11 | -2.35 |
| AL01006A2D02        | phototropic-responsive NPH3 family protein              | 6.00E-37  | <i>Arabidopsis thaliana</i>    | -4.81 | -3.06 | -8.68 |
| AL01004X1H04        | phytoalexin-deficient 4-1 protein                       | 5.00E-58  | <i>Solanum tuberosum</i>       | -2.02 | -2.24 | -3.24 |
| AL01.46.C1.Contig44 | Pi starvation-induced protein                           | 4.00E-34  | <i>Cicer arietinum</i>         | 3.27  | 4.21  | 2.94  |
| AL01003X1F07        | protein kinase                                          | 2.00E-25  | <i>Medicago truncatula</i>     | -7.62 | -8.51 | -8.33 |
| AL01006B1C07        | protein kinase family protein                           | 7.00E-66  | <i>Arabidopsis thaliana</i>    | -2.21 | -3.32 | -3.64 |
| AL01005A2D01        | putative Avr9/Cf-9 rapidly elicited protein             | 8.00E-55  | <i>Oryza sativa</i>            | -2.28 | -2.33 | -2.50 |
| AL01006B1A05        | putative His-Asp phosphotransfer protein                | 3.00E-27  | <i>Pisum sativum</i>           | -1.50 | -2.02 | -2.61 |
| AL010002000C07      | putative Ras-related GTP-binding protein                | 2.00E-63  | <i>Cucumis sativus</i>         | 2.03  | 1.22  | 1.28  |
| AL01003X1A03        | Response regulator receiver                             | 3.00E-05  | <i>Crocospaera watsonii</i>    | -5.59 | -5.13 | -5.18 |
| AL01005A1D08        | serine/threonine protein phosphatase 2A                 | 1.00E-10  | <i>Arabidopsis thaliana</i>    | -1.55 | -2.38 | -2.46 |
| AL010002000C05      | transducin family protein                               | 6.00E-45  | <i>Arabidopsis thaliana</i>    | 1.83  | 2.21  | 1.85  |
| AL01006A1G04        | transducin family protein / WD-40 repeat family protein | 2.00E-37  | <i>Arabidopsis thaliana</i>    | 1.76  | 13.13 | 8.27  |
| AL01006A2E05        | WD repeat domain 48                                     | 2.00E-06  | <i>Ostreococcus tauri</i>      | 2.22  | 2.36  | 1.70  |
| AL01005A2A11        | WD-40 repeat protein-like protein                       | 7.00E-64  | <i>Solanum tuberosum</i>       | 1.99  | 2.11  | 2.03  |

### Defense and Stress Related Proteins

|                     |                                       |           |                            |       |       |       |
|---------------------|---------------------------------------|-----------|----------------------------|-------|-------|-------|
| AL01.87.C1.Contig83 | Citrus Tristeza Virus Resistance Gene | 2.00E-09  | <i>Poncirus trifoliata</i> | 3.70  | -1.76 | -2.15 |
| AL01.44.C1.Contig42 | dessication-related protein           | 2.00E-111 | <i>Medicago truncatula</i> | 1.59  | 18.99 | 15.32 |
| AL01005B1A06        | DnaJ protein                          | 1.00E-22  | <i>Camellia sinensis</i>   | -2.53 | -2.27 | -3.76 |
| AL01.0.C1.Contig1   | early nodulin 93                      | 8.00E-26  | <i>Glycine max</i>         | 2.33  | 1.65  | 1.13  |

|                     |                                                 |          |                             |       |        |       |
|---------------------|-------------------------------------------------|----------|-----------------------------|-------|--------|-------|
| AL01006A1D11        | harpin-induced family protein                   | 6.00E-51 | <i>Arabidopsis thaliana</i> | -1.75 | -4.28  | -4.15 |
| AL01006B2G07        | harpin-induced protein 1                        | 7.00E-06 | <i>Oryza sativa</i>         | 1.29  | 1.27   | 2.74  |
| AL01006B2E11        | heat shock family protein                       | 5.00E-09 | <i>Arabidopsis thaliana</i> | -5.14 | -4.71  | -3.94 |
| AL01006B1E05        | nitrate responsive NOI protein                  | 7.00E-15 | <i>Arabidopsis thaliana</i> | 2.17  | 2.27   | 2.74  |
| AL01.69.C1.Contig66 | nodulin family protein                          | 2.00E-39 | <i>Arabidopsis thaliana</i> | 8.13  | 14.48  | 11.64 |
| AL01005A2B11        | nodulin MtN21                                   | 8.00E-05 | <i>Oryza sativa</i>         | 2.14  | 2.37   | -1.60 |
| AL01003X1E03        | nodulin MtN21 family protein                    | 3.00E-05 | <i>Arabidopsis thaliana</i> | 12.12 | 19.00  | 14.87 |
| AL01.33.C1.Contig32 | pathogenesis-related protein                    | 7.00E-55 | <i>Eutrema wasabi</i>       | -1.53 | 2.73   | 1.48  |
| AL010001000A06      | PMR5 (POWDERY MILDEW RESISTANT 5)               | 6.00E-34 | <i>Arabidopsis thaliana</i> | -2.28 | -4.93  | -6.25 |
| AL01005B1D09        | putative DnaJ protein                           | 2.00E-30 | <i>Camellia sinensis</i>    | -2.49 | -2.72  | -3.03 |
| AL01.4.C1.Contig5   | PVR3-like protein                               | 1.00E-12 | <i>Ananas comosus</i>       | -3.82 | -12.59 | -2.14 |
| AL010001000F05      | seed maturation protein PM39                    | 1.00E-14 | <i>Glycine max</i>          | 1.86  | 4.05   | 2.18  |
| AL01005A1F10        | silverleaf whitefly-induced protein             | 7.00E-41 | <i>Cucurbita pepo</i>       | 41.04 | 20.24  | 20.38 |
| AL01003X1B01        | small molecular heat shock protein 10           | 7.00E-38 | <i>Nelumbo nucifera</i>     | 4.34  | 2.99   | 2.98  |
| AL010002000A03      | snakin-1                                        | 2.00E-16 | <i>Solanum tuberosum</i>    | -1.49 | -3.04  | -1.93 |
| AL01006A1C09        | universal stress / early nodulin family protein | 4.00E-58 | <i>Arabidopsis thaliana</i> | 15.09 | 10.60  | 10.77 |
| AL01006A2D05        | universal stress / early nodulin family protein | 6.00E-23 | <i>Arabidopsis thaliana</i> | 9.61  | 6.55   | 6.98  |
| AL01006B2E09        | wound induced protein-like                      | 4.00E-07 | <i>Vitis vinifera</i>       | 2.15  | 1.25   | 2.24  |

**Secondary Metabolism**

|              |                                                 |          |                            |       |       |       |
|--------------|-------------------------------------------------|----------|----------------------------|-------|-------|-------|
| AL01005B1D07 | flavanone 3-hydroxylase                         | 1.00E-18 | <i>Saussurea medusa</i>    | 16.24 | 26.40 | 25.09 |
| AL01004X1C05 | glutathione S-transferase                       | 4.00E-60 | <i>Glycine max</i>         | 2.27  | 4.48  | 7.37  |
| AL01005A2B03 | glutathione S-transferase                       | 1.00E-12 | <i>Pisum sativum</i>       | 1.78  | 3.34  | 5.00  |
| AL01005B2G03 | glutathione S-transferase                       | 5.00E-18 | <i>Cucurbita maxima</i>    | -2.35 | 1.61  | 3.09  |
| AL01005A2F12 | phytoene desaturase                             | 1.00E-56 | <i>Momordica charantia</i> | -2.62 | -2.11 | -1.69 |
| AL01006B1H02 | phytoene synthase, chloroplast precursor (MEL5) | 2.00E-60 | <i>Cucumis melo</i>        | -7.97 | -3.58 | -3.30 |
| AL01004X1H07 | relA/spoT homologous protein RSH2               | 1.00E-17 | <i>Oryza sativa</i>        | -6.81 | -5.05 | -4.85 |

**Postranslational Modification**

|              |                             |          |                             |      |      |      |
|--------------|-----------------------------|----------|-----------------------------|------|------|------|
| AL01005B2A11 | NAD+ ADP-ribosyltransferase | 7.00E-29 | <i>Arabidopsis thaliana</i> | 2.91 | 4.19 | 4.38 |
|--------------|-----------------------------|----------|-----------------------------|------|------|------|

**Function Unclear**

|                |                                                   |          |                              |       |       |       |
|----------------|---------------------------------------------------|----------|------------------------------|-------|-------|-------|
| AL01003X1D08   | dormant bud-associated protein Drm1               | 2.00E-05 | <i>Pisum sativum</i>         | 2.43  | 2.22  | 1.91  |
| AL01004X1C01   | DOWNSTREAM TARGET OF AGL15 2                      | 1.00E-77 | <i>Arabidopsis thaliana</i>  | -1.12 | -1.83 | -2.21 |
| AL010001000F04 | embryonic 1 beta-globin                           | 1.00E-28 | <i>Monodelphis domestica</i> | 3.01  | 2.31  | 2.99  |
| AL01004X1H02   | NLI interacting factor (NIF) family protein       | 3.00E-39 | <i>Vitis vinifera</i>        | 1.33  | 2.80  | 3.08  |
| AL010002000A11 | pentatricopeptide (PPR) repeat-containing protein | 7.00E-11 | <i>Arabidopsis thaliana</i>  | -1.64 | -2.27 | -1.72 |
| AL01005B1A09   | PLASTID TRANSCRIPTIONALLY ACTIVE17                | 8.00E-91 | <i>Arabidopsis thaliana</i>  | -2.35 | -2.61 | -1.23 |

**No significant homology or Unknown function**

|                     |                  |    |    |       |        |       |
|---------------------|------------------|----|----|-------|--------|-------|
| AL010002000G05      | Unknown function | NA | NA | -2.67 | -3.24  | -2.92 |
| AL01004X1F10        | Unknown function | NA | NA | -4.33 | -22.88 | -2.24 |
| AL01005B1G08        | Unknown function | NA | NA | -4.03 | -3.29  | -3.99 |
| AL01005B1H02        | Unknown function | NA | NA | -2.25 | -1.51  | -1.66 |
| AL01006B2B02        | Unknown function | NA | NA | -3.22 | -3.42  | -3.28 |
| AL01003X1F10        | Unknown function | NA | NA | -2.01 | -2.15  | -1.93 |
| AL01005B2H12        | Unknown function | NA | NA | -1.94 | -1.98  | -3.06 |
| AL01003X1G05        | Unknown function | NA | NA | -2.95 | -6.07  | -6.61 |
| AL01005A2A04        | Unknown function | NA | NA | -2.15 | -3.15  | -6.66 |
| AL01003X1F05        | Unknown function | NA | NA | -2.28 | -2.99  | -3.54 |
| AL01004X1A05        | Unknown function | NA | NA | -1.38 | -2.29  | -3.07 |
| AL01004X1B12        | Unknown function | NA | NA | -1.82 | -2.56  | -2.67 |
| AL01005B2H07        | Unknown function | NA | NA | 1.58  | -2.28  | -2.09 |
| AL01006B2G12        | Unknown function | NA | NA | -1.70 | -1.77  | -2.12 |
| AL01006A2E12        | Unknown function | NA | NA | 2.28  | -1.51  | -2.79 |
| AL01.18.C1.Contig18 | Unknown function | NA | NA | 5.74  | 5.26   | 4.88  |
| AL01005A2C11        | Unknown function | NA | NA | 2.15  | 2.06   | 1.14  |
| AL01005B2G09        | Unknown function | NA | NA | 3.26  | 1.82   | -1.25 |
| AL01006A2C07        | Unknown function | NA | NA | 4.25  | 3.80   | 4.02  |
| AL01006A1B10        | Unknown function | NA | NA | 2.10  | 1.42   | 1.47  |
| AL01.67.C1.Contig64 | Unknown function | NA | NA | 4.29  | 1.67   | 4.74  |
| AL01003X1B06        | Unknown function | NA | NA | 6.17  | 8.59   | 7.06  |
| AL01003X1H06        | Unknown function | NA | NA | 2.21  | 2.44   | 2.88  |
| AL01006B1B12        | Unknown function | NA | NA | 2.37  | 2.03   | 2.46  |
| AL01006B2G01        | Unknown function | NA | NA | 2.39  | 2.06   | 3.25  |
| AL01.43.C1.Contig41 | Unknown function | NA | NA | 6.22  | 8.91   | 6.80  |

|                     |                         |    |    |         |         |         |
|---------------------|-------------------------|----|----|---------|---------|---------|
| AL01005A1G10        | Unknown function        | NA | NA | 1.36    | 3.34    | 3.66    |
| AL010002000B09      | Unknown function        | NA | NA | 1.08    | 2.33    | 7.90    |
| AL010002000B12      | No significant homology | NA | NA | -2.32   | -2.44   | -2.85   |
| AL010002000H01      | No significant homology | NA | NA | -2.50   | -1.44   | -1.26   |
| AL01003X1B11        | No significant homology | NA | NA | -3.82   | -3.65   | -3.23   |
| AL01003X1C07        | No significant homology | NA | NA | -2.41   | -1.32   | -1.27   |
| AL01003X1C11        | No significant homology | NA | NA | -2.06   | -1.46   | -1.52   |
| AL01003X1D09        | No significant homology | NA | NA | -2.75   | -2.53   | -2.48   |
| AL01003X1E10        | No significant homology | NA | NA | -2.06   | -2.26   | -2.08   |
| AL01003X1E11        | No significant homology | NA | NA | -2.15   | -2.61   | -2.31   |
| AL010001000B02      | No significant homology | NA | NA | -2.59   | -1.62   | -1.44   |
| AL01004X1C04        | No significant homology | NA | NA | -2.14   | -1.81   | -1.97   |
| AL01004X1C10        | No significant homology | NA | NA | -2.37   | -1.58   | -1.36   |
| AL01004X1F02        | No significant homology | NA | NA | -2.64   | -2.64   | -2.09   |
| AL01004X1F05        | No significant homology | NA | NA | -2.12   | -2.17   | -2.11   |
| AL01005B1E09        | No significant homology | NA | NA | -2.25   | -2.35   | -2.47   |
| AL01005B2G06        | No significant homology | NA | NA | -2.49   | -3.00   | -2.72   |
| AL01006A1B02        | No significant homology | NA | NA | -3.15   | -2.21   | -2.56   |
| AL01006A1D08        | No significant homology | NA | NA | -2.43   | -1.53   | -1.37   |
| AL01006A1G11        | No significant homology | NA | NA | -2.54   | -1.98   | -1.98   |
| AL01006A2A09        | No significant homology | NA | NA | -3.59   | -3.48   | -3.52   |
| AL01006A2C02        | No significant homology | NA | NA | -2.03   | -1.84   | -1.70   |
| AL01006A2G01        | No significant homology | NA | NA | -2.01   | -2.30   | -2.16   |
| AL01006B2C09        | No significant homology | NA | NA | -2.03   | -1.47   | -1.29   |
| AL01006B2F07        | No significant homology | NA | NA | -2.48   | -1.41   | -2.03   |
| AL01006B2G04        | No significant homology | NA | NA | -2.07   | -1.40   | -1.26   |
| AL01006B2H01        | No significant homology | NA | NA | -2.30   | 1.04    | 1.27    |
| AL01006B2H06        | No significant homology | NA | NA | -2.76   | -2.00   | -1.63   |
| AL01005A2D11        | No significant homology | NA | NA | -3.71   | -3.26   | -1.92   |
| AL010001000B11      | No significant homology | NA | NA | -6.24   | -5.92   | -9.75   |
| AL01004X1F11        | No significant homology | NA | NA | -4.10   | -3.65   | -2.31   |
| AL01005A2B02        | No significant homology | NA | NA | -4.38   | -5.37   | -4.60   |
| AL01005B2B08        | No significant homology | NA | NA | -7.12   | -9.03   | -10.06  |
| AL01006A1A10        | No significant homology | NA | NA | -8.89   | -8.24   | -5.94   |
| AL01006A1D12        | No significant homology | NA | NA | -21.46  | -6.35   | 1.16    |
| AL01006A1F10        | No significant homology | NA | NA | -10.29  | -5.85   | -5.58   |
| AL01006A2B11        | No significant homology | NA | NA | -6.02   | -3.73   | -2.62   |
| AL01003X1B12        | No significant homology | NA | NA | -2.01   | -1.75   | -1.52   |
| AL01006B2C03        | No significant homology | NA | NA | -2.17   | -2.20   | -2.26   |
| AL01005A1H07        | No significant homology | NA | NA | -2.2381 | -2.6413 | -2.3111 |
| AL01005A2B01        | No significant homology | NA | NA | -2.2878 | -2.9455 | -2.3941 |
| AL01006B1B04        | No significant homology | NA | NA | -11.93  | -18.35  | -21.46  |
| AL01005B2D06        | No significant homology | NA | NA | -2.78   | -3.78   | -3.38   |
| AL010002000G02      | No significant homology | NA | NA | -1.53   | -2.43   | -2.30   |
| AL01004X1D03        | No significant homology | NA | NA | -1.24   | -2.29   | -3.35   |
| AL01004X1F03        | No significant homology | NA | NA | -2.58   | -4.31   | -5.54   |
| AL01005B1B10        | No significant homology | NA | NA | -1.66   | -1.91   | -2.32   |
| AL01006A2C10        | No significant homology | NA | NA | -1.63   | -2.64   | -2.35   |
| AL01006A2C12        | No significant homology | NA | NA | 1.32    | -2.46   | -2.56   |
| AL01006B1B01        | No significant homology | NA | NA | -1.79   | -2.73   | -3.15   |
| AL01.60.C1.Contig57 | No significant homology | NA | NA | -8.51   | -11.79  | -31.45  |
| AL01005A1E09        | No significant homology | NA | NA | -1.43   | -4.43   | -7.22   |
| AL01003X1B08        | No significant homology | NA | NA | 1.20    | -2.31   | -2.40   |
| AL01003X1G08        | No significant homology | NA | NA | -1.90   | -2.40   | -2.48   |
| AL01003X1H07        | No significant homology | NA | NA | -1.29   | -1.67   | -2.06   |
| AL01004X1B02        | No significant homology | NA | NA | -2.78   | -7.05   | -6.62   |
| AL010002000A02      | No significant homology | NA | NA | -2.10   | -2.71   | -3.38   |
| AL010002000H09      | No significant homology | NA | NA | -2.57   | -8.08   | -4.21   |
| AL01005A1G12        | No significant homology | NA | NA | -1.7538 | -2.1915 | -2.1137 |
| AL01005B1E05        | No significant homology | NA | NA | 1.56    | -10.00  | -9.69   |
| AL01006A1E05        | No significant homology | NA | NA | 2.61    | 1.20    | 1.97    |
| AL01.24.C1.Contig24 | No significant homology | NA | NA | 4.13    | 3.23    | 2.83    |
| AL01.3.C1.Contig3   | No significant homology | NA | NA | 12.53   | 14.01   | 10.35   |
| AL01.3.C2.Contig4   | No significant homology | NA | NA | 15.12   | 16.36   | 12.61   |
| AL01.42.C1.Contig40 | No significant homology | NA | NA | 2.34    | 2.05    | 1.36    |
| AL01.54.C1.Contig51 | No significant homology | NA | NA | 5.21    | 4.36    | 3.19    |

|                     |                         |    |    |       |       |       |
|---------------------|-------------------------|----|----|-------|-------|-------|
| AL010001000C05      | No significant homology | NA | NA | 4.77  | 1.62  | 2.36  |
| AL010002000E03      | No significant homology | NA | NA | 4.83  | 1.15  | 1.19  |
| AL010002000G10      | No significant homology | NA | NA | 5.79  | 3.82  | 3.11  |
| AL01003X1A05        | No significant homology | NA | NA | 9.76  | 1.69  | -1.70 |
| AL01005A1C02        | No significant homology | NA | NA | 3.40  | 3.28  | 2.16  |
| AL01005A2E03        | No significant homology | NA | NA | 2.08  | 1.59  | 1.61  |
| AL01005A2G11        | No significant homology | NA | NA | 3.98  | 1.56  | 1.65  |
| AL01005B1G01        | No significant homology | NA | NA | 6.46  | 3.14  | 6.31  |
| AL01005B1G09        | No significant homology | NA | NA | 3.29  | 2.43  | 1.54  |
| AL01006B2C02        | No significant homology | NA | NA | 19.22 | 20.95 | 15.81 |
| AL01006B1C01        | No significant homology | NA | NA | 2.45  | 1.22  | 1.32  |
| AL01005A1E03        | No significant homology | NA | NA | 1.83  | 2.24  | 1.83  |
| AL01.31.C1.Contig30 | No significant homology | NA | NA | 4.93  | 4.47  | 5.81  |
| AL01.32.C1.Contig31 | No significant homology | NA | NA | 2.22  | 2.52  | 2.55  |
| AL01003X1D07        | No significant homology | NA | NA | 2.29  | 2.42  | 2.53  |
| AL01003X1E07        | No significant homology | NA | NA | 6.31  | 6.44  | 7.23  |
| AL01005A1B09        | No significant homology | NA | NA | 3.04  | 3.20  | 3.61  |
| AL01005A1E02        | No significant homology | NA | NA | 4.26  | 4.68  | 5.54  |
| AL01005A1G03        | No significant homology | NA | NA | 1.65  | 1.94  | 2.03  |
| AL01005A2E06        | No significant homology | NA | NA | 4.46  | 3.20  | 5.30  |
| AL01006B1H09        | No significant homology | NA | NA | 2.20  | 1.51  | 4.56  |
| AL01006B2F11        | No significant homology | NA | NA | 3.22  | 3.93  | 3.35  |
| AL01005B2D01        | No significant homology | NA | NA | 2.30  | 3.09  | 4.38  |
| AL01006A2C03        | No significant homology | NA | NA | 2.94  | 5.67  | 4.65  |
| AL010001000E07      | No significant homology | NA | NA | -1.40 | 3.65  | 1.25  |
| AL01005A1H01        | No significant homology | NA | NA | 1.44  | 4.94  | 3.82  |
| AL01005A2C12        | No significant homology | NA | NA | -1.46 | -1.20 | 2.62  |
| AL01005B1C11        | No significant homology | NA | NA | -2.91 | 1.23  | 1.72  |
| AL01006A1F01        | No significant homology | NA | NA | 1.79  | 5.03  | 15.47 |
| AL01006B1A02        | No significant homology | NA | NA | 1.20  | 1.42  | 2.23  |
| AL01006B1F02        | No significant homology | NA | NA | 1.03  | 2.30  | 1.86  |
| AL01005B2H09        | No significant homology | NA | NA | 1.30  | 1.42  | 2.85  |
